# Supplementary material for: Transarterial Radioembolization for Unresectable Hepatocellular Carcinoma: Real-Life Efficacy and Safety Analysis of Korean Patients
Source: MDPI journal article supplement (doi:10.3390/cancers14020385), 2022-01-13
Supplement: s1 [file s1]

**Table S1.** Treatment parameters of TARE

| Variable                            | Patients<br>N=149 |
|-------------------------------------|-------------------|
| <b>SIR-spheres treatment target</b> |                   |
| Whole liver                         | 38 (25.5)         |
| Rt. lobe                            | 84 (56.4)         |
| Lt. lobe                            | 8 (5.4)           |
| Segment(s)                          | 19 (12.8)         |
| Whole liver volume (mL)             | 1604.1 ± 600.2    |
| Targeted liver volume (mL)          | 1097.3 ± 571.9    |
| Targeted tumor volume (mL)          | 348.7 ± 418.4     |
| Tumor burden (%)                    | 18.1 ± 16.3       |
| Delivered activity (GBq)            | 1.98 ± 0.89       |
| Tumor dose (Gy)                     | 235 ± 195         |
| <b>Length of hospital stay</b>      |                   |
| Minor hospitalization (<48 h)       | 24 (16.1)         |
| Major hospitalization (>48 h)       | 125 (83.9)        |

Values are expressed as mean ± SD or n (%).

TARE, transarterial radioembolization.

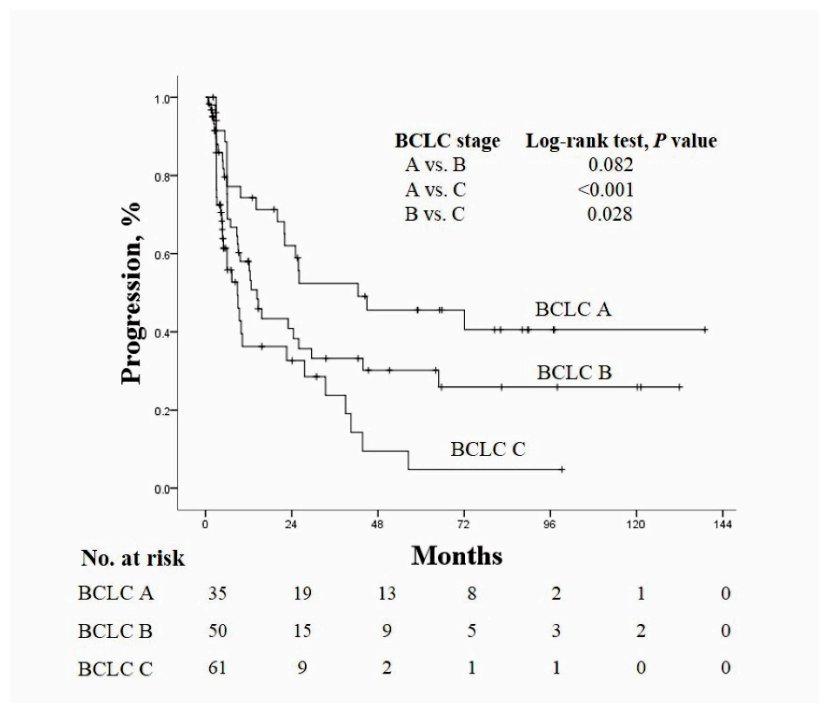

**Figure S1.** The Kaplan-Meier curves of progression according to BCLC stages

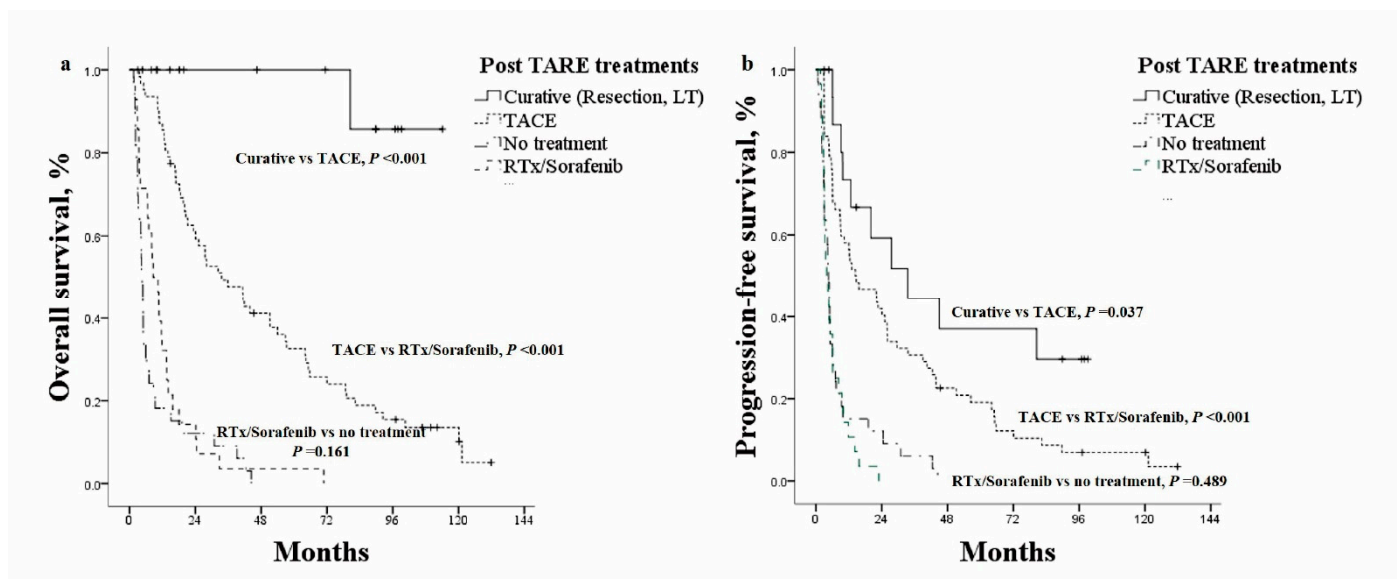

**Figure S2.** The Kaplan-Meier curves of (a) overall survival and (b) progression free survival according to different treatment modalities following TARE treatment
